# Supplementary material for: Exploring the mode of action of inhibitors targeting the PhoP response regulator ofSalmonella entericathrough comprehensive pharmacophore approaches
Source: Royal Society of Chemistry journal article supplement (doi:10.1039/c9ra00620f), 2019-01-01
Supplement: c9ra00620f1.pdf [file c9ra00620f1.pdf]

## **Exploring the mode of action of inhibitors targeting PhoP response regulator of *Salmonella enterica* through comprehensive pharmacophore approaches**

Keng-Chang Tsai<sup>a, b†</sup>, Po-Pin Hung<sup>c†</sup>, Ching-Feng Cheng<sup>d, e</sup>, Chinpan Chen<sup>e\*</sup> and Tien-Sheng Tseng<sup>f\*</sup>

<sup>a</sup>National Research Institute of Chinese Medicine, Ministry of Health and Welfare, Taipei 112, Taiwan.

<sup>b</sup>The Ph.D. Program for Medical Biotechnology, College of Medical Science and Technology, Taipei Medical University, Taipei, Taiwan.

<sup>c</sup>Division of Infectious Disease, Department of Internal Medicine, Taipei Tzu chi Hospital, The Buddhist Tzu chi Medical Foundation, New Taipei City 231, Taiwan.

<sup>d</sup>Department of Pediatrics, Taipei Tzu Chi Hospital, Buddhist Tzu Chi Medical Foundation, Taipei and Tzu Chi University, Hualien, Taiwan.

<sup>e</sup>Institute of Biomedical Sciences, Academia Sinica Taipei 115, Taiwan.

<sup>f</sup>Department of Research, Taipei Tzu chi Hospital, The Buddhist Tzu chi Medical Foundation, New Taipei City 231, Taiwan.

† These authors contributed equally to this work.

\*Corresponding authors: Chinpan Chen and Tien-Sheng Tseng

## Supporting information

### Molecular dynamics simulations

The MD simulations were conducted through the “**Standard Dynamics Cascade**” module implemented in Discovery Studio 3.5 (Accelrys Software, Inc., San Diego, CA, USA). All the docked inhibitors were subjected to a set of minimization and equilibration steps followed by molecular dynamics using CHARMM forcefield. The parameter settings of the standard dynamics cascade were described as follows. For the first **Minimization**, the “**Steepest Decent**” was chose as the algorithm. The “**Max Steps**” and the “**RMS Gradients**” were set to 1,000 and 1.0, respectively. For the second **Minimization**, “**Adopted Basis NR**” was employed as the algorithm. The “**Max Steps**” and the “**RMS Gradients**” were set to 2,000 and 0.1, individually. About the **Heating**, the **Simulation time (ps)**, **Time Step (fs)**, **Initial temperature**, **Target Temperature**, **Adjust Velocity Frequency**, and the **Save Results Interval (ps)** were set to 4, 2, 50, 300, 50, and 2, respectively. After that, the **Equilibration** was done with the **Simulation Time**, **Time Step (fs)**, **Target Temperature**, **Adjust Velocity Frequency**, and the **Save Results Interval (ps)** set to 10, 2, 300, 50, and 2, individually.

For the “**Production**”, all the parameters were set as defaults. The “**Nonbond List Radius**” was set to 14, and “**Electrostatic**” was set to “**Automatic**”.

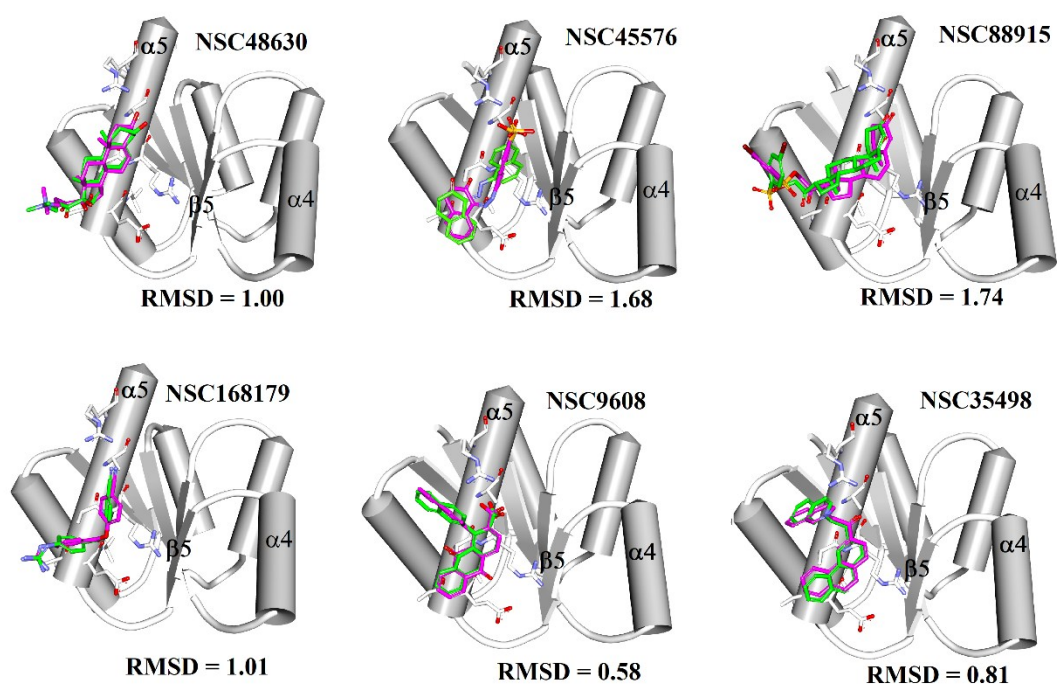

**Fig. S1. The diagrammatic representations of the superimpositions of the docked PhoP inhibitors before and after molecular dynamic simulations.** The docked PhoP inhibitors from ligand-pharmacophore mapping were subjected to molecular dynamic simulations. The inhibitors shown in magenta and green are the poses before and after molecular dynamic simulations, respectively.
